# Supplementary material for: Tyrosinase inhibitory activity, molecular docking studies and antioxidant potential of chemotypes of Lippia origanoides (Verbenaceae) essential oils
Source: PubMed Central journal article supplement (PMC5411033; doi:10.1371/journal.pone.0175598), 2017-05-01
Supplement: pone.0175598.s001.pdf [file pone.0175598.s001.pdf]

**S1 Table. DPPH scavenging of *Lippia organoides* essential oils.**

| Experiment         | Inhibition (%) |        |        |        |        |
|--------------------|----------------|--------|--------|--------|--------|
|                    | LiOr-1         | LiOr-2 | LiOr-3 | LiOr-4 | LiOr-5 |
| 1                  | 40.96          | 77.85  | 27.52  | 18.08  | 49.44  |
| 2                  | 24.40          | 77.20  | 22.64  | 14.98  | 49.76  |
| 3                  | 17.54          | 77.52  | 25.08  | 16.45  | 49.68  |
| Average            | 27.6           | 77.50  | 25.10  | 16.50  | 49.60  |
| Standard deviation | 12.0           | 0.30   | 2.40   | 1.50   | 0.20   |
