# Supplementary material for: Tyrosinase inhibitory activity, molecular docking studies and antioxidant potential of chemotypes of Lippia origanoides (Verbenaceae) essential oils
Source: PubMed Central journal article supplement (PMC5411033; doi:10.1371/journal.pone.0175598), 2017-05-01
Supplement: pone.0175598.s003.pdf [file pone.0175598.s003.pdf]

**S3 Table. Values of tyrosinase inhibition for *Lippia organoides* essential oils using the substrate L-tyrosine.**

| Experiment         | Samples inhibition (%) |        |        |        |        |        |
|--------------------|------------------------|--------|--------|--------|--------|--------|
|                    | Kojic acid             | LiOr-1 | LiOr-2 | LiOr-3 | LiOr-4 | LiOr-5 |
| 1                  | 75.36                  | 33.92  | 84.71  | 30.59  | 66.67  | 12.31  |
| 2                  | 65.94                  | 42.06  | 85.19  | 48.15  | 59.41  | 12.31  |
| 3                  | 78.99                  | 35.29  | 84.34  | 30.59  | 61.62  | 5.61   |
| Average            | 73.43                  | 37.09  | 84.75  | 36.44  | 62.57  | 10.08  |
| Standard deviation | 5.50                   | 3.56   | 0.35   | 8.28   | 3.04   | 3.16   |
