# Supplementary material for: Tyrosinase inhibitory activity, molecular docking studies and antioxidant potential of chemotypes of Lippia origanoides (Verbenaceae) essential oils
Source: PubMed Central journal article supplement (PMC5411033; doi:10.1371/journal.pone.0175598), 2017-05-01
Supplement: pone.0175598.s004.pdf [file pone.0175598.s004.pdf]

**S4 Table. Values of tyrosinase inhibition for *Lippia organoides* essential oils using the substrate L-DOPA.**

| Experiment         | Samples inhibition (%) |        |        |        |        |        |
|--------------------|------------------------|--------|--------|--------|--------|--------|
|                    | Kojic acid             | LiOr-1 | LiOr-2 | LiOr-3 | LiOr-4 | LiOr-5 |
| 1                  | 94.34                  | 6.25   | 0      | 11.11  | 12.50  | 5.56   |
| 2                  | 92.95                  | 8.67   | 0      | 17.27  | 5.76   | 6.47   |
| 3                  | 90.85                  | 11.39  | 0      | 16.67  | 14.67  | 6.67   |
| Average            | 92.71                  | 8.77   | 0      | 15.02  | 10.98  | 6.23   |
| Standard deviation | 1.43                   | 2.10   | 0      | 2.77   | 3.79   | 0.48   |
